# Supplementary material
Source: ML conference proceedings conference paper supplement (https://openaccess.thecvf.com/content/ICCV2025/html/Chen_SAMora_Enhancing_SAM_ICCV_2025_paper.html)
Supplement: Supplementary file 1 [file Chen_SAMora_Enhancing_SAM_ICCV_2025_supplemental.pdf]

# SAMora: Enhancing SAM through Hierarchical Self-Supervised Pre-Training for Medical Images

## Supplementary Material

Table 7. Stage1 Setting.

| Config             | image-level | patch-level | pixel-level |
|--------------------|-------------|-------------|-------------|
| Optimizer          | LARS        | AdamW       | AdamW       |
| Base learning rate | 0.075       | 1.5e-4      | 1e-4        |
| Batch size         | 512         | 512         | 512         |
| Weight decay       | 1e-4        | 0.05        | 0.05        |
| Warmup period      | 30          | 30          | 10          |
| epoch nums         | 80          | 60          | 30          |

Table 8. Stage2 Setting.

| Config             | SAMora | SAMora-2 | H-SAMora |
|--------------------|--------|----------|----------|
| Optimizer          | AdamW  | AdamW    | AdamW    |
| Base learning rate | 5e-3   | 5e-3     | 2.5e-3   |
| Batch size         | 32     | 32       | 32       |
| Weight decay       | 0.1    | 0.1      | 0.1      |
| Warmup period      | 25     | 25       | 25       |
| epoch nums         | 20     | 25       | 30       |

In this supplementary material, we first provide more implementation details for training strategies and datasets (Sec. A). Then, we conduct more additional ablation studies (Sec. B) to validate the effectiveness of each component in our proposed method. Finally, we discuss SAMora’s limitations and potential directions for future work (Sec. C).

### A. Implementation Details

#### A.1. Training strategy

We provide the training strategy and hyperparameter settings as supplementary material.

In Stage 1, we perform pretraining for image-level, patch-level, and pixel-level tasks using different models: SimCLRv2 (ResNet50 (2X+SK)) for the image-level task, MAE (ViT-Large) for the patch-level task, and a denoising model (U-net model) for the pixel-level task. As shown in Table 6, for image-level task, We adopt warmup during training, The learning rate is linearly increased for the first 5% of epochs, and then decayed with a cosine decay schedule where the weight decay is  $1e^{-4}$ , followed by SimCLRv2 [7]. For the patch-level and pixel-level tasks, we use the AdamW optimizer. The optimizer momentum is set to 0.9 and 0.95 for the patch-level task, and 0.9 and 0.99 for the pixel-level task, respectively.

The training loss is a combination of Dice loss and Mean Squared Error (MSE) loss. As indicated in Tab. 7, the weights for these losses are set to 0.9 for Dice loss and 0.1 for MSE loss. In our two-stage hierarchical structure, each stage applies a weighted loss, controlled by a parameter that gradually decreases through exponential decay, starting from 0.4 and reaching 0 over 300 epochs.

In Tab. 8, we present the settings for Stage 2 across various backbones. For SAMora, SAMed (ViT-B) serves as the backbone. The loss weights are assigned as 0.2 for cross-entropy and 0.8 for Dice loss. For the warmup configuration, the initial learning rate is set to 0.005, with a warmup period of 250 steps, and the total number of iterations is

18,600. Notably, the learning rate adjustment strategy is described as follows:

$$l_r = \begin{cases} T \frac{I_{lr}}{WP}, & T \leq WP, \\ I_{lr} \left(1 - \frac{T-WP}{MI}\right), & T > WP. \end{cases} \quad (1)$$

Where  $I_{lr}$  represents the initial learning rate, while  $T$ ,  $WP$ , and  $MI$  denote the training iterations, warmup period, and maximum iterations, respectively.

SAMora-2 uses SAM2 (hiera-base-plus) as the backbone, with the only difference being that the number of epochs is set to 25. All other training parameters remain the same as those of SAMora. The configuration of H-SAMora follows the guidelines of H-SAM [9].

#### A.2. Additional datasets information

We detail the dataset settings. Firstly, the unlabeled data that we use to pre-train is sampled from the Amos22 [14], LiTS [4], KiTS [11], and Decathlon Challenge [1] datasets.

- AMOS22 [14] is a large-scale dataset that provides 500 CT and 100 MRI scans with voxel-level annotations for 15 abdominal organs, supporting both CT-only and cross-modality segmentation tasks across diverse clinical scenarios.
- The LiTS dataset [4] focuses on liver and liver tumor segmentation. It comprises 201 abdominal CT volumes, helping to tackle challenges such as lesion variability and segmentation complexity, making it a widely used benchmark for medical imaging algorithms.
- The KiTS dataset [11] emphasizes kidney and kidney tumor segmentation. Its 2019 release, KiTS19, includes 300 CT cases, collected from patients who underwent nephrectomy, and is designed to support automated kidney and tumor segmentation research through comprehensive annotations.
- The Decathlon Challenge dataset [1] offers a broad range of segmentation tasks across multiple organs, aiming to advance generalization in medical image analysis. It provides an opportunity to test algorithms on various

Table 9. Ablation study on rank size of LoRA layers.

| Method          | Rank = 1     | Rank = 4     | Rank = 16    |
|-----------------|--------------|--------------|--------------|
| SAMed           | 69.12        | 75.57        | 69.03        |
| SAMora (Ours)   | 75.26        | 79.41        | 76.88        |
| SAMed-2         | 69.89        | 76.68        | 73.54        |
| SAMora-2 (Ours) | 75.53        | 80.24        | 76.12        |
| H-SAM           | 72.14        | 80.35        | 77.14        |
| H-SAMora (Ours) | <b>78.91</b> | <b>84.34</b> | <b>80.57</b> |

Table 10. Effectiveness of HL-Attn compared to HCAT.

| Model          | Mean Dice(%) | Inference Time(s) |
|----------------|--------------|-------------------|
| HCAT           | <b>84.40</b> | 4.2               |
| HL-Attn (ours) | 84.34        | <b>3.1</b>        |

072  
073  
074  
075  
076  
077  
078  
079  
080  
081  
082  
083  
084  
085  
086  
087  
088  
089  
090  
091  
092  
093  
094  
095  
096  
097  
098  
099  
100  
101  
102  
103  
104  
105  
106  
107  
108  
109  
110  
111  
112  
113

anatomical regions and imaging scenarios, making it ideal for benchmarking segmentation models across different tasks.

In Stage 2, we utilize the Synapse dataset from the MIC-CAI 2015 Multi-Atlas Abdomen Labeling Challenge. For the fully supervised training setup, we adhere to the H-SAM framework to evaluate the segmentation performance across eight abdominal organs: the aorta, gallbladder, spleen, left kidney, right kidney, liver, pancreas, and stomach.

In addition to the fully supervised setup, we also implement a few-shot learning scenario. For this, we adopt a slice-based data selection strategy, randomly sampling 10% of the training data (221 slices) from different subjects within the complete training set, which consists of 2,212 axial slices.

### A.3. Preprocessing and augmentation strategies for training datasets

To improve the generalization ability of the model and enhance the robustness of training, we follow the preprocessing and data augmentation strategies adopted in TransUNet [6], SAMed [27], H-SAM [9].

The original medical images are first resampled to a uniform spatial resolution to mitigate variations caused by different imaging protocols. Following TransUNet, for 3D volumetric data, each volume is processed in a slice-by-slice manner, where the slices are extracted along the axial plane. The extracted 2D slices are then normalized to zero mean and unit variance to ensure consistent intensity distributions across different datasets.

To prevent overfitting and improve the diversity of training samples, we employ several data augmentation techniques:

- **Random rotation:** Each image slice is randomly rotated by an angle within  $[-15^\circ, 15^\circ]$  to simulate different orientations.
- **Random flipping:** Horizontal and vertical flipping are applied with a probability of 0.5 to introduce spatial variability.
- **Scaling:** The images are randomly scaled within the range  $[0.9, 1.1]$  to enhance robustness to size variations.
- **Elastic deformation:** Spatially elastic transformations are applied to simulate realistic deformations in medical

images.

- **Contrast and brightness adjustment:** To account for variations in image acquisition settings, we randomly adjust the contrast and brightness of images.

These augmentation strategies ensure that the model learns from diverse image distributions while preserving anatomical structures.

All preprocessing and augmentation operations are implemented using standard deep learning libraries, and applied online during training to maximize variability in training samples.

## B. Additional analysis

### B.1. Ablation study on the LoRA component

We also conduct our additional ablation studies on 10% Synapse dataset. In the Tab. 9, we compare the effectiveness of the layers of LoRA component among these models and their variants. From the result, we found that all models and their variants, the best performance is achieved when the rank increases to 4, while the performance drops when the rank increases to 16.

Furthermore, the model incorporating multiple LoRA experts exhibits a smaller performance gap compared to the original model at different rank values, suggesting that the proposed mechanisms enhance the model’s robustness to variations in the rank parameter.

### B.2. Additional study on the HL-Attn

Our work focuses on proposing an innovative multi-level framework that integrates existing methods in a novel way to address specific challenges in medical image analysis. While we build upon widely recognized techniques like MAE and SimCLRv2, leveraging strong foundations is common and necessary in advancing research. The novelty of HL-Attn lies in the hierarchical design and effective combination of these methods, with a focus on simplicity and adaptability. Even with a straightforward fusion strategy, our approach demonstrates significant gains. To further validate the effectiveness of our method, we conducted experiments on the hierarchical cross-attention transformer (HCAT). The results (Tab. 10), demonstrate that HL-Attn achieves comparable mean Dice scores with a reduction in inference time, highlighting the efficiency of our framework.

114  
115  
116  
117  
118  
119  
120  
121  
122  
123  
124  
125  
126  
127  
128  
129  
130  
131  
132  
133  
134  
135  
136  
137  
138  
139  
140  
141  
142  
143  
144  
145  
146  
147  
148  
149  
150  
151  
152  
153  
154  
155

Table 11. Full Effectiveness of Different Multiple LoRA experts Fusion Strategies

| Image-level LoRA | Patch-level LoRA | Pixel-level LoRA | Fusion Module  | 10% Synapse  | 5% LA        | 7.5% PROMISE12 |
|------------------|------------------|------------------|----------------|--------------|--------------|----------------|
| ✓                | ✓                | ✓                | LAC [26]       | 82.41        | 90.01        | 88.97          |
| ✓                | ✓                | ✓                | MOLE [21]      | 83.91        | 91.59        | 89.44          |
| ✓                | ✓                | ✓                | LoRAHub [12]   | 81.07        | 88.31        | 87.43          |
| ✓                | ✓                | ✓                | HL-Attn (ours) | <b>84.34</b> | <b>92.46</b> | <b>90.14</b>   |
| 1                | 1                | 2                | HL-Attn (ours) | 84.21        | 92.10        | 89.95          |
| 1                | 2                | 1                | HL-Attn (ours) | 83.86        | 91.80        | 89.72          |
| 2                | 1                | 1                | HL-Attn (ours) | <b>84.34</b> | <b>92.46</b> | <b>90.14</b>   |

### B.3. Effectiveness of Different Multiple LoRA experts Fusion Strategies

We have further supplement our experiments on the LA and PROMISE12 datasets to provide a more comprehensive assessment of SAMora’s segmentation performance. The results in Tab. 11 show that HL-Attn outperforms other fusion strategies across both datasets, achieving the highest mean Dice scores. This demonstrates the effectiveness of our proposed method in enhancing segmentation performance across different medical imaging tasks.

### B.4. Complementarity of multiple LoRAs

Furthermore, the Fig. 6 illustrates the complementarity across the three LoRA levels. It shows that individual levels fail to capture certain structural details, while the fusion image effectively integrates these features, resulting in improved overall accuracy. This highlights how the hierarchical fusion leverages distinct strengths from each level. These visual results demonstrate that the modifications to the model architecture have successfully guided the network to concentrate on the most relevant features.

### B.5. Clarification of Training Time

The CPT process can be seen as an equivalent fine-tuning phase for SimCLRv2 and MAE. For CPT, we sampled 100,000 images from datasets like AMOS and employed a comprehensive pre-training process integrating SimCLRv2 and MAE to effectively learn hierarchical features. As shown in the table, models with shorter CPT durations demonstrate that SAMora can balance efficiency and performance. H-SAMora-T1, which excludes CPT and performs minimal pre-training, achieves a Mean Dice of 80.72, slightly outperforming H-SAM. H-SAMora-T2, with a reduced CPT duration of 0.8 hours, improves further to 80.97. The full CPT version, H-SAMora, achieves the highest Mean Dice of 84.34, highlighting the benefits of a complete pre-training process. These results confirm SAMora’s adaptability to different resource constraints, as even shorter CPT durations deliver significant improvements, while the default CPT duration maximizes performance and demonstrates the framework’s full potential. The detailed training configurations and results will be presented in the revised

manuscript.

Table 12. Results of different training time of CPT

| Model       | CPT  | Pre-Training | Fine-Tuning | Mean Dice    |
|-------------|------|--------------|-------------|--------------|
| H-SAM       | -    | -            | 2           | 80.35        |
| H-SAMora-T1 | -    | 1.8          | 0.1         | 80.72        |
| H-SAMora-T2 | 0.8  | 1.3          | 0.1         | 80.97        |
| H-SAMora    | 12.7 | 13.4         | 0.1         | <b>84.34</b> |

### B.6. Statistical validation

To address this concern, we conducted statistical validation to confirm the significance of our performance improvements on the Synapse dataset. We performed a paired t-test on the mean Dice scores of SAMora, SAMed, SAMora-2, SAMed-2, H-SAMora, and H-SAM. The results show highly significant differences, such as H-SAMora versus H-SAM with a p-value of  $1.7 \times 10^{-8}$  and a 95% confidence interval of [0.0329, 0.0407]. Similarly, SAMora outperforms SAMed with a p-value of 0.0167 and SAMora-2 outperforms SAMed-2 with a p-value of 0.0281. These statistical tests validate the robustness and significance of the reported improvements, and the detailed analysis will be included in the revised manuscript.

Although SAMora performs well in most medical image segmentation tasks, its performance may degrade when handling noisy or low-quality images. Future research could focus on improving the model’s robustness to such challenging image quality issues.

### B.7. Complete Experimental Results

This section presents the full experimental results only partially included in the main text, providing a more comprehensive evaluation of the proposed method. Table 13 offers a detailed performance comparison of SAM and SAM2 variants on the Synapse dataset, where bold numbers indicate the best performance. Table 14 extends the comparison by benchmarking various SAM variants against multiple semi-supervised methods across different datasets. Additionally, Table 15 provides a complete ablation analysis of multiple LoRA experts on the 10% Synapse dataset, where "Scratch" refers to models trained from scratch. At the same time, "T-S" denotes training using a teacher-student

Figure 6. Complementarity of multiple LoRAs.

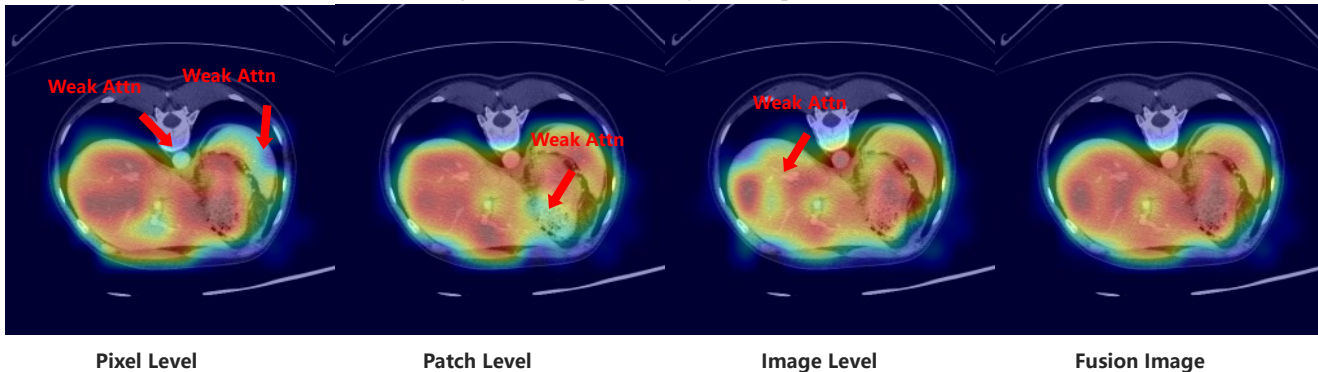

Table 13. Full Performance Comparison of SAM and SAM2 Variants on Synapse Dataset. Bold numbers indicate the best performance. By default, we utilize SAM as our base model. † indicates H-SAM based model; \* indicates SAM2 based model.

| Training Set     | Method           | Spleen       | Right Kidney | Left Kidney  | Gallbladder  | Liver        | Stomach      | Aorta        | Pancreas     | Mean Dice ↑  | HD ↓         |
|------------------|------------------|--------------|--------------|--------------|--------------|--------------|--------------|--------------|--------------|--------------|--------------|
| 10%              | AutoSAM [15]     | 68.80        | 77.44        | 76.53        | 24.87        | 88.06        | 52.70        | 75.19        | 34.58        | 55.69        | 31.67        |
|                  | SAM Adapter [8]  | 72.42        | 68.38        | 66.77        | 22.38        | 89.69        | 53.15        | 66.74        | 26.76        | 58.28        | 54.22        |
|                  | SAMed [27]       | 85.82        | 82.25        | 82.62        | 63.15        | 92.72        | 67.20        | 78.72        | 52.12        | 75.57        | 23.02        |
|                  | SAMora (Ours)    | <b>88.04</b> | <b>83.41</b> | <b>86.07</b> | <b>67.33</b> | <b>94.27</b> | <b>69.20</b> | <b>82.85</b> | <b>64.13</b> | <b>79.41</b> | <b>15.68</b> |
|                  | SAMed-2*         | 86.61        | 83.01        | 84.56        | 61.51        | 91.07        | 69.02        | 77.99        | 52.09        | 76.68        | 18.93        |
|                  | SAMora-2* (Ours) | <b>87.81</b> | <b>85.73</b> | <b>86.35</b> | <b>68.30</b> | <b>93.78</b> | <b>75.24</b> | <b>81.12</b> | <b>63.62</b> | <b>80.24</b> | <b>16.27</b> |
|                  | H-SAM [9]        | 90.21        | 84.16        | 85.65        | 70.70        | 94.29        | 76.10        | 85.54        | 56.17        | 80.35        | 15.54        |
|                  | H-SAMora† (Ours) | <b>92.46</b> | <b>85.13</b> | <b>86.71</b> | <b>73.15</b> | <b>95.82</b> | <b>81.85</b> | <b>88.56</b> | <b>72.72</b> | <b>84.34</b> | <b>11.63</b> |
| Fully Supervised | TransUNet [6]    | 81.87        | 85.08        | 77.02        | 63.16        | 94.08        | 75.62        | 87.23        | 55.86        | 77.49        | 31.69        |
|                  | UNETR [10]       | 85.60        | 85.00        | 84.52        | 56.30        | 94.57        | 70.46        | 89.80        | 60.47        | 78.35        | 18.59        |
|                  | SwinUnet [5]     | 85.47        | 66.53        | 83.28        | 79.61        | 94.29        | 56.58        | 90.66        | 76.60        | 79.13        | 21.55        |
|                  | TransDeepLab [2] | 86.04        | 69.16        | 84.08        | 79.88        | 93.53        | 61.19        | 89.00        | 78.40        | 80.16        | 21.25        |
|                  | DAE-Former [3]   | 88.96        | 72.30        | 86.08        | <b>80.88</b> | 94.98        | 65.12        | 91.94        | 79.19        | 82.43        | 17.46        |
|                  | MERIT [19]       | <b>92.01</b> | 84.85        | <b>87.79</b> | 74.40        | 95.26        | 85.38        | 87.71        | 71.81        | 84.90        | 13.22        |
|                  | nnFormer [28]    | 86.57        | 90.51        | 86.25        | 70.17        | <b>96.84</b> | <b>86.83</b> | 92.04        | <b>83.35</b> | 86.57        | 10.63        |
|                  | UNETR++ [20]     | 87.54        | <b>95.77</b> | 87.18        | 71.25        | 96.42        | 86.01        | <b>92.52</b> | 81.10        | <b>87.22</b> | <b>7.53</b>  |
|                  | SAM Adapter [8]  | 83.68        | <b>79.00</b> | 79.02        | 57.49        | 92.67        | 69.48        | 77.93        | 43.07        | 72.80        | 33.08        |
|                  | SAM3D [24]       | 84.29        | 85.64        | <b>86.31</b> | 49.81        | 95.42        | <b>76.11</b> | <b>89.57</b> | 69.32        | 79.56        | 17.87        |
|                  | SAMed [27]       | 87.77        | 69.11        | 80.45        | 79.95        | 94.80        | 72.17        | 88.72        | 82.06        | 81.88        | 20.64        |
|                  | SAMora (Ours)    | <b>89.27</b> | 74.05        | <b>81.04</b> | <b>81.51</b> | <b>94.97</b> | 74.53        | 88.87        | <b>82.42</b> | <b>83.33</b> | <b>14.57</b> |
|                  | SAMed-2*         | 88.63        | 68.63        | 81.22        | 80.33        | 95.18        | 71.00        | 87.63        | 81.93        | 82.12        | 12.76        |
|                  | SAMora-2* (Ours) | <b>91.78</b> | <b>75.85</b> | <b>82.02</b> | <b>83.52</b> | <b>95.49</b> | <b>75.11</b> | <b>87.11</b> | <b>82.26</b> | <b>84.14</b> | <b>10.28</b> |
|                  | H-SAM [9]        | 93.34        | 89.93        | 91.88        | 73.49        | 95.72        | 87.10        | 89.38        | 71.11        | 86.49        | 8.18         |
|                  | H-SAMora† (Ours) | <b>94.62</b> | <b>91.45</b> | <b>93.00</b> | <b>76.55</b> | <b>96.51</b> | <b>89.95</b> | <b>89.55</b> | <b>77.09</b> | <b>88.59</b> | <b>7.09</b>  |

229 framework. These tables collectively reinforce the find- 237  
 230 ings and conclusions drawn in the main text, offering more 238  
 231 profound insights into the effectiveness of the proposed ap- 239  
 232 proach. 240

233 **C. Limitation and Future Work** 242

234 Despite the promising results of SAMora, several limita- 243  
 235 tions need to be addressed in future research. 244

236 While SAMora reduces the reliance on labeled data

through self-supervised learning, it still requires some la- 237  
 238 beled data for fine-tuning. Therefore, further exploration 239  
 240 of fully unsupervised data is needed. On the other hand, 241  
 242 we observe that weakly labeled data, compared to fully la- 243  
 244 beled data, has been widely applied in research due to its 245  
 245 lower cost and reduced need for manual annotation, which 246

Table 14. Full Comparison of SAM Variants against Semi-Supervised Methods across Various Datasets

| Method          | 10%<br>Synapse | 5%<br>LA     | 7.5%<br>PROMISE12 |
|-----------------|----------------|--------------|-------------------|
| nnUnet [13]     | -              | 64.02        | 84.22             |
| UA-MT [25]      | -              | 82.26        | 65.05             |
| SS-Net [23]     | 56.74          | 86.33        | 73.19             |
| MC-Net [22]     | 61.20          | 83.59        | 72.66             |
| DTC [17]        | -              | 81.25        | 63.44             |
| AutoSAM [15]    | 55.69          | 74.73        | 68.40             |
| SAM Adapter [8] | 58.28          | 82.79        | 75.45             |
| SAMed [27]      | 75.57          | 87.72        | 86.00             |
| SAMora (Ours)   | <b>79.41</b>   | <b>90.13</b> | <b>88.44</b>      |
| SAMed-2         | 76.68          | 87.91        | 86.50             |
| SAMora-2 (Ours) | <b>80.24</b>   | <b>91.04</b> | <b>89.27</b>      |
| H-SAM [9]       | 80.35          | 89.22        | 87.27             |
| H-SAMora (Ours) | <b>84.34</b>   | <b>92.46</b> | <b>90.14</b>      |

Table 15. Full Ablation Analysis of Multiple LoRA experts on 10% Synapse. “Scratch” means the model is trained from scratch, while “T-S” indicates the model is trained by the Teacher-Student framework

| Image-level<br>LoRA  | Patch-level<br>LoRA  | Pixel-level<br>LoRA | Model    | Mean Dice<br>(%) |
|----------------------|----------------------|---------------------|----------|------------------|
| <b>Scratch</b>       | <b>X</b>             | <b>X</b>            | SAMora   | 77.20            |
| <b>T-S (w/o CPT)</b> | <b>X</b>             | <b>X</b>            | SAMora   | 77.31            |
| <b>T-S (w/ CPT)</b>  | <b>X</b>             | <b>X</b>            | SAMora   | <b>78.03</b>     |
| <b>Scratch</b>       | <b>X</b>             | <b>X</b>            | H-SAMora | 82.09            |
| <b>T-S (w/o CPT)</b> | <b>X</b>             | <b>X</b>            | H-SAMora | 82.17            |
| <b>T-S (w/ CPT)</b>  | <b>X</b>             | <b>X</b>            | H-SAMora | <b>82.65</b>     |
| <b>X</b>             | <b>Scratch</b>       | <b>X</b>            | SAMora   | 76.54            |
| <b>X</b>             | <b>T-S (w/o CPT)</b> | <b>X</b>            | SAMora   | 77.19            |
| <b>X</b>             | <b>T-S (w/ CPT)</b>  | <b>X</b>            | SAMora   | <b>78.81</b>     |
| <b>X</b>             | <b>Scratch</b>       | <b>X</b>            | H-SAMora | 81.67            |
| <b>X</b>             | <b>T-S (w/o CPT)</b> | <b>X</b>            | H-SAMora | 82.04            |
| <b>X</b>             | <b>T-S (w/ CPT)</b>  | <b>X</b>            | H-SAMora | <b>83.02</b>     |
| <b>X</b>             | <b>X</b>             | <b>Scratch</b>      | SAMora   | 76.97            |
| <b>X</b>             | <b>X</b>             | <b>Scratch</b>      | H-SAMora | 81.58            |

246 performance, allowing it to better generalize across a broader  
247 range of medical image segmentation tasks.



248  
249  
250  
251  
252  
253  
254  
255  
256  
257  
258  
259  
260  
261  
262  
263  
264  
265  
266  
267  
268  
269  
270  
271  
272  
273  
274  
275  
276  
277  
278  
279  
280  
281  
282  
283  
284  
285  
286  
287  
288  
289  
290  
291  
292  
293  
294  
295  
296  
297  
298  
299  
300  
301  
302  
303

**References**

[1] Michela Antonelli, Annika Reinke, Spyridon Bakas, Keyvan Farahani, Annette Kopp-Schneider, Bennett A Landman, Geert Litjens, Bjoern Menze, Olaf Ronneberger, Ronald M Summers, et al. The medical segmentation decathlon. *Nature communications*, 13(1):4128, 2022. 1

[2] Reza Azad, Moein Heidari, Moein Shariatnia, Ehsan Khodapanah Aghdam, Sanaz Karimijafarbigloo, Ehsan Adeli, and Dorit Merhof. Transdeeplab: Convolution-free transformer-based deeplab v3+ for medical image segmentation. In *International Workshop on PRedictive Intelligence In MEdicine*, pages 91–102. Springer, 2022. 4

[3] Reza Azad, René Arimond, Ehsan Khodapanah Aghdam, Amirhossein Kazerouni, and Dorit Merhof. Dae-former: Dual attention-guided efficient transformer for medical image segmentation. In *International Workshop on PRedictive Intelligence In MEdicine*, pages 83–95. Springer, 2023. 4

[4] Patrick Bilic, Patrick Christ, Hongwei Bran Li, Eugene Vorontsov, Avi Ben-Cohen, Georgios Kaissis, Adi Szeskin, Colin Jacobs, Gabriel Efrain Humpire Mamani, Gabriel Chartrand, et al. The liver tumor segmentation benchmark (lits). *Medical Image Analysis*, 84:102680, 2023. 1

[5] Hu Cao, Yueyue Wang, Joy Chen, Dongsheng Jiang, Xiaopeng Zhang, Qi Tian, and Manning Wang. Swin-unet: Unet-like pure transformer for medical image segmentation. In *European conference on computer vision*, pages 205–218. Springer, 2022. 4

[6] Jieneng Chen, Yongyi Lu, Qihang Yu, Xiangde Luo, Ehsan Adeli, Yan Wang, Le Lu, Alan L Yuille, and Yuyin Zhou. Transunet: Transformers make strong encoders for medical image segmentation. *arXiv preprint arXiv:2102.04306*, 2021. 2, 4

[7] Ting Chen, Simon Kornblith, Kevin Swersky, Mohammad Norouzi, and Geoffrey E Hinton. Big self-supervised models are strong semi-supervised learners. *Advances in neural information processing systems*, 33:22243–22255, 2020. 1

[8] Tianrun Chen, Lanyun Zhu, Chaotao Ding, Runlong Cao, Yan Wang, Zejian Li, Lingyun Sun, Papa Mao, and Ying Zang. Sam fails to segment anything?—sam-adapter: Adapting sam in underperformed scenes: Camouflage, shadow, medical image segmentation, and more. *arXiv preprint arXiv:2304.09148*, 2023. 4, 5

[9] Zhiheng Cheng, Qingyue Wei, Hongru Zhu, Yan Wang, Liangqiong Qu, Wei Shao, and Yuyin Zhou. Unleashing the potential of sam for medical adaptation via hierarchical decoding. In *Proceedings of the IEEE/CVF Conference on Computer Vision and Pattern Recognition*, pages 3511–3522, 2024. 1, 2, 4, 5

[10] Ali Hatamizadeh, Yucheng Tang, Vishwesh Nath, Dong Yang, Andriy Myronenko, Bennett Landman, Holger R Roth, and Daguang Xu. Unetr: Transformers for 3d medical image segmentation. In *Proceedings of the IEEE/CVF winter conference on applications of computer vision*, pages 574–584, 2022. 4

[11] Nicholas Heller, Niranjana Sathianathan, Arveen Kalapara, Edward Walczak, Keenan Moore, Heather Kaluzniak, Joel

Rosenberg, Paul Blake, Zachary Rengel, Makinna Oestreich, et al. The kits19 challenge data: 300 kidney tumor cases with clinical context, ct semantic segmentations, and surgical outcomes. *arXiv preprint arXiv:1904.00445*, 2019. 1

[12] Chengsong Huang, Qian Liu, Bill Yuchen Lin, Tianyu Pang, Chao Du, and Min Lin. Lorahub: Efficient cross-task generalization via dynamic lora composition. *arXiv preprint arXiv:2307.13269*, 2023. 3

[13] Fabian Isensee, Paul F Jaeger, Simon AA Kohl, Jens Petersen, and Klaus H Maier-Hein. nnu-net: a self-configuring method for deep learning-based biomedical image segmentation. *Nature methods*, 18(2):203–211, 2021. 5

[14] Yuanfeng Ji, Haotian Bai, Chongjian Ge, Jie Yang, Ye Zhu, Ruimao Zhang, Zhen Li, Lingyan Zhannng, Wanling Ma, Xiang Wan, et al. Amos: A large-scale abdominal multi-organ benchmark for versatile medical image segmentation. *Advances in neural information processing systems*, 35:36722–36732, 2022. 1

[15] Chengyin Li, Prashant Khanduri, Yao Qiang, Rafi Ibn Sultan, Indrin Chetty, and Dongxiao Zhu. Auto-prompting sam for mobile friendly 3d medical image segmentation. *arXiv e-prints*, pages arXiv–2308, 2023. 4, 5

[16] Han Liu, Zhoubing Xu, Riqiang Gao, Hao Li, Jianing Wang, Guillaume Chabin, Ipek Oguz, and Sasa Grbic. Cosst: Multi-organ segmentation with partially labeled datasets using comprehensive supervisions and self-training. *IEEE Transactions on Medical Imaging*, 2024. 4

[17] Xiangde Luo, Jieneng Chen, Tao Song, and Guotai Wang. Semi-supervised medical image segmentation through dual-task consistency. In *Proceedings of the AAAI conference on artificial intelligence*, pages 8801–8809, 2021. 5

[18] Olivier Petit, Nicolas Thome, and Luc Soler. Iterative confidence relabeling with deep convnets for organ segmentation with partial labels. *Computerized Medical Imaging and Graphics*, 91:101938, 2021. 4

[19] Md Mostafijur Rahman and Radu Marculescu. Multi-scale hierarchical vision transformer with cascaded attention decoding for medical image segmentation. In *Medical Imaging with Deep Learning*, pages 1526–1544. PMLR, 2024. 4

[20] Abdelrahman M Shaker, Muhammad Maaz, Hanoona Rasheed, Salman Khan, Ming-Hsuan Yang, and Fahad Shahbaz Khan. Unetr++: delving into efficient and accurate 3d medical image segmentation. *IEEE Transactions on Medical Imaging*, 2024. 4

[21] Xun Wu, Shaohan Huang, and Furu Wei. Mixture of lora experts. *arXiv preprint arXiv:2404.13628*, 2024. 3

[22] Yicheng Wu, Minfeng Xu, Zongyuan Ge, Jianfei Cai, and Lei Zhang. Semi-supervised left atrium segmentation with mutual consistency training. In *Medical image computing and computer assisted intervention—MICCAI 2021: 24th international conference, Strasbourg, France, September 27–October 1, 2021, proceedings, part II 24*, pages 297–306. Springer, 2021. 5

[23] Yicheng Wu, Zhonghua Wu, Qianyi Wu, Zongyuan Ge, and Jianfei Cai. Exploring smoothness and class-separation for semi-supervised medical image segmentation. In *International conference on medical image computing and*

- 361 *computer-assisted intervention*, pages 34–43. Springer,  
 362 2022. 5
- 363 [24] Yunhan Yang, Xiaoyang Wu, Tong He, Hengshuang Zhao,  
 364 and Xihui Liu. Sam3d: Segment anything in 3d scenes. *arXiv*  
 365 *preprint arXiv:2306.03908*, 2023. 4
- 366 [25] Lequan Yu, Shujun Wang, Xiaomeng Li, Chi-Wing Fu, and  
 367 Pheng-Ann Heng. Uncertainty-aware self-ensembling model  
 368 for semi-supervised 3d left atrium segmentation. In *Med-*  
 369 *ical image computing and computer assisted intervention–*  
 370 *MICCAI 2019: 22nd international conference, Shenzhen,*  
 371 *China, October 13–17, 2019, proceedings, part II 22*, pages  
 372 605–613. Springer, 2019. 5
- 373 [26] Jinghan Zhang, Junteng Liu, Junxian He, et al. Compos-  
 374 ing parameter-efficient modules with arithmetic operation.  
 375 *Advances in Neural Information Processing Systems*, 36:  
 376 12589–12610, 2023. 3
- 377 [27] Kaidong Zhang and Dong Liu. Customized segment any-  
 378 thing model for medical image segmentation. *arXiv preprint*  
 379 *arXiv:2304.13785*, 2023. 2, 4, 5
- 380 [28] Hong-Yu Zhou, Jiansen Guo, Yinghao Zhang, Lequan Yu,  
 381 Liansheng Wang, and Yizhou Yu. nnformer: Interleaved  
 382 transformer for volumetric segmentation. *arXiv preprint*  
 383 *arXiv:2109.03201*, 2021. 4
